# Supplementary material for: The Circadian Clock Controls Immune Checkpoint Pathway in Sepsis
Source: PubMed Central journal article supplement — Cell Rep. Author manuscript; Available in PMC 2019 Jul 10. (PMC6094382; doi:10.1016/j.celrep.2018.06.026), 2018-07-10
Supplement: NIHMS1500938-supplement-1.pdf [file NIHMS1500938-supplement-1.pdf]

**Cell Reports, Volume 24**

## **Supplemental Information**

### **The Circadian Clock Controls**

### **Immune Checkpoint Pathway in Sepsis**

**Wenjun Deng, Shan Zhu, Ling Zeng, Jiao Liu, Rui Kang, Minghua Yang, Lizhi Cao, Haichao Wang, Timothy R. Billiar, Jianxin Jiang, Min Xie, and Daolin Tang**

**Table S1. Gene promoter sequence of Pd-11 (also termed Cd274) and Pkm2, Related to Figure 4.** The classical E-box DNA motif (“CAGCTG”) is highlighted in yellow.

**>FP020059 *Cd274\_1*:+U EU: NC; range -499 to 100.**

ccaagcacacgtccccccacccccacccccgacctcaggtccactcccacccaaaatagagctgagttgttactctggact  
gtttctttgagggaaacctgattacaagaaagctaatagcaggttcactttcacttttagtttcgttttaaatagtgtttgtttgtttgttt  
ttatcgacagcctctcagtagcagccccggtgtcttgagctctctatagaccagagactcacctgccactggctcctgagctact  
ggaattaaggcgtgtgtcaccgcaccgaagcctagtttcgtttttctaaactgtgaatatcccaaagctgactctaaagtcacccg  
caggaaatactatgagataaactcatgctcaaaggactgggtggcttcggtttcacagacagcggaggttgacaaggcttcc  
gcgagtgggcggggctctgaactcgagataagaccaggaaatcgtggtccccaagcctcATGCCAGGCTGCAC  
TTGCACGTCGCGGGCCAGTCTCCTCGCCTGCAGGTAAGGGAGCATCTTCTCGC  
GGAATCCGCTTGCAGGGCACTTTAAAGAGCCAGA

**>FP010946 *Pkm2\_1*:+U EU: NC; range -499 to 100.**

ggtgtactggggcgggcgccgggagggtggagagctccggggcggggctggaggaatgtccgtggacctataaatctgggc  
accgcctggtagggcagggcagatggggagacctgggcaaaaggccaaaagggaacatttttagccgatctaaagcaa  
caggtggcgggtggcgccccgggaacctaggggtggtggtggcgggcgggcgctggccccggtggcgggccttctccc  
tcaccacttccccattggtcaacaggataacccttgagcaaatggtctacgatgtccttccgccacggaaggtagtcctctcaa  
aagggaacctgcttgcctaccctgagcttctcaggaggtgcgggcgccccgtgagaggcggggcgcccgccggc  
cgagccccgattgggcgagggcggggctgcggagggttgcggcgccccgcagctgtgataacctgaggccccagtcg  
gcgagccccGCACAGCAGCGACTCGTCTTCACTTGACTGACGTCCGCTCTAGGTA  
TCGCAGCAGGAACCGAAGTACGCCCGAGGTGAGCGGGGAGAACCTAAGCCA  
TCTG
